# Supplementary material
Source: PubMed Central journal article supplement (PMC2976327)
Supplement: supp_78_11_4779__1.pdf [file supp_78_11_4779__1.pdf]

**Table S1. Genes whose expression is most affected by the constitutive phosphorylation of CpxR.**

| ORF    | Gene          | Description                                                              | A <sup>a</sup> | SD   |
|--------|---------------|--------------------------------------------------------------------------|----------------|------|
| HD0281 | <i>fimA</i>   | possible fimbrial major pilin protein                                    | 3.47           | 1.05 |
| HD0282 | <i>fimB</i>   | possible fimbrial structural subunit                                     | 3.01           | 0.32 |
| HD0283 | <i>fimC</i>   | probable fimbrial outer membrane usher protein                           | 2.55           | 0.54 |
| HD1109 |               | putative oxalate/formate antiporter                                      | 2.41           | 0.06 |
| HD1435 | <i>ompP2B</i> | outer membrane protein P2 homolog                                        | 2.30           | 0.15 |
| HD0284 | <i>fimD</i>   | probable periplasmic fimbrial chaperone                                  | 2.29           | 0.08 |
| HD1512 |               | acriflavine resistance protein                                           | 2.20           | 0.14 |
| HD1163 | <i>ribAB</i>  | riboflavin biosynthesis protein ribA                                     | 2.19           | 0.52 |
| HD1590 | <i>deaD</i>   | cold-shock DEAD box protein-A                                            | 2.13           | 0.15 |
| HD1591 |               | conserved hypothetical protein                                           | 2.09           | 0.26 |
| HD1343 |               | hypothetical protein                                                     | 1.90           | 0.15 |
| HD1434 |               | hypothetical protein                                                     | 1.90           | 0.10 |
| HD0386 | <i>apbE</i>   | thiamine biosynthesis lipoprotein                                        | 1.88           | 0.05 |
| HD1165 | <i>ribH</i>   | 6,7-dimethyl-8-ribityllumazine synthase                                  | 1.82           | 0.14 |
| HD1162 | <i>ribE</i>   | riboflavin synthase, alpha chain                                         | 1.78           | 0.13 |
| HD0312 | <i>dppB</i>   | dipeptide transport system permease protein                              | 1.74           | 0.17 |
| HD1161 | <i>ribD</i>   | riboflavin-specific deaminase                                            | 1.73           | 0.20 |
| HD1621 |               | conserved hypothetical protein                                           | 1.71           | 0.19 |
| HD1513 |               | putative RND efflux membrane fusion protein                              | 1.69           | 0.15 |
| HD1629 | <i>lolB</i>   | outer membrane lipoprotein LolB                                          | 1.67           | 0.15 |
| HD0313 | <i>dppC</i>   | dipeptide transport system permease protein                              | 1.66           | 0.16 |
| HD1084 |               | hesB family protein                                                      | 1.66           | 0.12 |
| HD1622 |               | conserved hypothetical protein                                           | 1.66           | 0.25 |
| HD1142 | <i>sdaA</i>   | L-serine dehydratase                                                     | 1.65           | 0.54 |
| HD0765 | <i>manA</i>   | mannose-6-phosphate isomerase                                            | 1.62           | 0.05 |
| HD0286 |               | hypothetical protein                                                     | 1.62           | 0.16 |
| HD0812 | <i>artI</i>   | arginine ABC transporter, periplasmic-binding protein                    | 1.61           | 0.21 |
| HD0792 | <i>ccmF</i>   | cytochrome c-type biogenesis protein                                     | 1.57           | 0.17 |
| HD0287 |               | hypothetical protein                                                     | 1.57           | 0.15 |
| HD1179 | <i>ksgA</i>   | dimethyladenosine transferase                                            | 1.56           | 0.57 |
| HD1640 |               | hypothetical protein                                                     | 1.54           | 0.57 |
| HD1511 | <i>glmU</i>   | bifunctional GlmU protein                                                | 1.50           | 0.08 |
| HD0352 |               | hypothetical protein                                                     | 1.50           | 0.13 |
| HD0634 | <i>accB</i>   | probable biotin carboxyl carrier protein of acetyl-CoA carboxylase       | 1.48           | 0.17 |
| HD0635 | <i>accC</i>   | biotin carboxylase                                                       | 1.46           | 0.11 |
| HD0382 | <i>nqrD</i>   | Na <sup>+</sup> -translocating NADH-ubiquinone oxidoreductase, subunit D | 1.42           | 0.05 |
| HD0383 | <i>nqrE</i>   | Na <sup>+</sup> -translocating NADH-ubiquinone oxidoreductase, subunit E | 1.42           | 0.05 |
| HD0351 | <i>prfC</i>   | peptide chain release factor 3                                           | 1.42           | 0.16 |
| HD0381 | <i>nqrC</i>   | Na <sup>+</sup> -translocating NADH-ubiquinone oxidoreductase, subunit C | 1.41           | 0.07 |

|        |              |                                                                          |      |      |
|--------|--------------|--------------------------------------------------------------------------|------|------|
| HD0994 | <i>potD1</i> | spermidine/putrescine-binding periplasmic protein                        | 1.41 | 0.45 |
| HD0384 | <i>nqrF</i>  | Na <sup>+</sup> -translocating NADH-ubiquinone oxidoreductase, subunit F | 1.40 | 0.10 |
| HD0195 |              | hypothetical protein                                                     | 1.39 | 0.09 |
| HD1007 | <i>bioB</i>  | biotin synthetase                                                        | 1.39 | 0.12 |
| HD1628 | <i>ispE</i>  | 4-diphosphocytidyl-2-C-methyl-D-erythritol kinase                        | 1.38 | 0.08 |
| HD0564 | <i>aspA</i>  | aspartate ammonia-lyase                                                  | 1.37 | 0.05 |
| HD2012 | <i>lipA</i>  | lipoic acid synthetase                                                   | 1.36 | 0.20 |
| HD1354 |              | conserved hypothetical protein                                           | 1.36 | 0.10 |
| HD0766 | <i>manZ</i>  | mannose-specific phosphotransferase system IID component                 | 1.32 | 0.08 |
| HD1010 | <i>prc</i>   | tail-specific protease                                                   | 1.31 | 0.21 |
| HD1146 | <i>glpF</i>  | glycerol uptake facilitator protein                                      | 1.30 | 0.06 |
| HD1974 | <i>rpsQ</i>  | 30S ribosomal protein S17                                                | 1.29 | 0.18 |
| HD2017 |              | possible rare lipoprotein A                                              | 1.29 | 0.06 |
| HD0380 | <i>nqrB</i>  | NADH dehydrogenase                                                       | 1.29 | 0.08 |
| HD0315 | <i>dppD</i>  | dipeptide transport ATP-binding protein                                  | 1.28 | 0.09 |
| HD2016 | <i>dacA</i>  | penicillin-binding protein 5                                             | 1.27 | 0.08 |
| HD1355 |              | conserved hypothetical protein                                           | 1.26 | 0.05 |
| HD1342 | <i>recJ</i>  | single-stranded-DNA-specific exonuclease RecJ                            | 1.25 | 0.04 |
| HD0648 | <i>tnaB</i>  | tryptophan-specific transport protein                                    | 1.24 | 0.09 |
| HD0767 | <i>manY</i>  | mannose-specific phosphotransferase system IIC component                 | 1.23 | 0.08 |
| HD1806 | <i>thiI</i>  | thiamine biosynthesis protein ThiI                                       | 1.23 | 0.15 |
| HD1357 |              | conserved possible translation initiation factor                         | 1.22 | 0.05 |
| HD1876 | <i>rpoC</i>  | RNA polymerase beta subunit                                              | 1.22 | 0.11 |
| HD1086 |              | conserved hypothetical protein                                           | 1.20 | 0.07 |
| HD0404 | <i>lpxM</i>  | lipid A acyltransferase                                                  | 1.20 | 0.13 |
| HD1712 | <i>ispZ</i>  | probable intracellular septation protein                                 | 1.20 | 0.05 |
| HD1975 | <i>rpmC</i>  | 50S ribosomal protein L29                                                | 1.18 | 0.11 |
| HD0246 | <i>ftsW</i>  | cell division protein FtsW                                               | 1.18 | 0.12 |
| HD0471 | <i>gcp</i>   | putative sialylglycoprotease                                             | 1.18 | 0.18 |
| HD1624 | <i>aceF</i>  | dihydrolipoamide acetyltransferase                                       | 1.18 | 0.07 |
| HD1085 | <i>hscB</i>  | chaperone protein HscB                                                   | 1.17 | 0.10 |
| HD1978 | <i>rplV</i>  | 50S ribosomal protein L22                                                | 1.16 | 0.09 |
| HD1353 | <i>ihfB</i>  | integration host factor, beta subunit                                    | 1.14 | 0.16 |
| HD0445 |              | possible ADP-heptose--lipooligosaccharide heptosyltransferase I          | 1.13 | 0.15 |
| HD0449 | <i>fis</i>   | DNA-binding protein                                                      | 1.12 | 0.16 |
| HD1630 | <i>msbA</i>  | ABC transporter ATP-binding protein MsbA                                 | 1.12 | 0.11 |
| HD1648 | <i>glpR</i>  | glycerol-3-phosphate regulon repressor                                   | 1.12 | 0.15 |
| HD0300 | <i>grxA</i>  | glutaredoxin                                                             | 1.11 | 0.14 |
| HD0614 | <i>kefB</i>  | glutathione-regulated potassium-efflux system protein                    | 1.11 | 0.06 |
| HD1771 | <i>djlA</i>  | DnaJ-like protein DjIA                                                   | 1.10 | 0.10 |
| HD1325 |              | conserved hypothetical protein                                           | 1.10 | 0.07 |
| HD1087 | <i>hscA</i>  | chaperone protein HscA                                                   | 1.09 | 0.07 |
| HD1089 |              | conserved hypothetical protein                                           | 1.09 | 0.08 |

|        |             |                                                                      |      |      |
|--------|-------------|----------------------------------------------------------------------|------|------|
| HD0316 | <i>dppF</i> | dipeptide transport ATP-binding protein                              | 1.09 | 0.09 |
|        |             | transcription termination-antitermination factor nusA, N utilization |      |      |
| HD1462 | <i>nusA</i> | substance protein A                                                  | 1.09 | 0.07 |
| HD0400 | <i>rnfD</i> | putative Na-translocating NADH-quinone reductase                     | 1.09 | 0.07 |
| HD0647 |             | conserved hypothetical protein                                       | 1.08 | 0.13 |
| HD1982 | <i>rplD</i> | 50S ribosomal protein L4                                             | 1.08 | 0.12 |
| HD1471 |             | conserved hypothetical protein                                       | 1.08 | 0.07 |
| HD1160 | <i>glpC</i> | anaerobic glycerol-3-phosphate dehydrogenase, subunit C              | 1.08 | 0.02 |
| HD0250 |             | conserved hypothetical protein                                       | 1.08 | 0.10 |
| HD0353 | <i>htpX</i> | putative protease                                                    | 1.08 | 0.08 |
| HD1158 | <i>glpB</i> | anaerobic glycerol-3-phosphate dehydrogenase, subunit B              | 1.06 | 0.05 |
| HD1088 | <i>fdx2</i> | ferredoxin                                                           | 1.04 | 0.06 |
| HD1199 | <i>pgpB</i> | phosphatidylglycerophosphatase B                                     | 1.02 | 0.20 |
| HD1786 | <i>mutT</i> | mutator MutT protein                                                 | 1.02 | 0.05 |
| HD0318 |             | possible fimbrial biogenesis and twitching motility protein PilF     | 1.02 | 0.17 |
| HD1356 | <i>pyrF</i> | orotidine 5'-phosphate decarboxylase                                 | 1.00 | 0.06 |
| HD1957 | <i>secY</i> | preprotein translocase SecY subunit                                  | 1.00 | 0.08 |
| HD1189 | <i>lpxD</i> | UDP-3-O-(3-hydroxymyristoyl) glucosamine N-acyltransferase           | 1.00 | 0.06 |
| HD1805 |             | putative MAF protein                                                 | 0.98 | 0.15 |
| HD1011 |             | hypothetical protein                                                 | 0.96 | 0.08 |
| HD1219 |             | conserved hypothetical protein                                       | 0.96 | 0.14 |
| HD1220 | <i>ykgF</i> | putative iron-sulfur electron transport protein                      | 0.96 | 0.08 |
| HD1731 | <i>nrdA</i> | ribonucleoside-diphosphate reductase, alpha chain                    | 0.96 | 0.11 |
| HD1191 | <i>D15</i>  | outer membrane protein D-15                                          | 0.95 | 0.09 |
| HD0889 | <i>deoD</i> | purine nucleoside phosphorylase                                      | 0.94 | 0.07 |
| HD0451 |             | conserved hypothetical protein                                       | 0.92 | 0.07 |
| HD1143 | <i>sdaC</i> | serine transporter                                                   | 0.92 | 0.07 |
| HD0835 |             | putative transport protein                                           | 0.91 | 0.08 |
| HD1461 | <i>infB</i> | translation initiation factor IF-2                                   | 0.91 | 0.08 |
| HD1983 | <i>rplC</i> | 50S ribosomal protein L3                                             | 0.91 | 0.10 |
| HD0223 | <i>dnaQ</i> | DNA polymerase III epsilon chain                                     | 0.90 | 0.12 |
| HD1400 |             | putative soluble lytic murein transglycosylase                       | 0.90 | 0.07 |
| HD1824 | <i>modB</i> | molybdenum ABC transporter, permease protein                         | 0.89 | 0.08 |
| HD0876 |             | conserved probable ribonuclease                                      | 0.88 | 0.09 |
| HD0989 | <i>pflA</i> | pyruvate formate-lyase activating enzyme                             | 0.87 | 0.10 |
| HD1747 |             | hypothetical protein                                                 | 0.87 | 0.15 |
| HD1282 | <i>fhs</i>  | putative formate--tetrahydrofolate ligase                            | 0.85 | 0.08 |
| HD0990 | <i>pflB</i> | formate acetyltransferase                                            | 0.84 | 0.07 |
| HD1623 | <i>lpdA</i> | dihydrolipoamide dehydrogenase                                       | 0.84 | 0.07 |
| HD0371 |             | conserved hypothetical protein                                       | 0.83 | 0.09 |
| HD1607 | <i>lepB</i> | signal peptidase I                                                   | 0.83 | 0.11 |
| HD0425 |             | hypothetical protein                                                 | 0.83 | 0.12 |
| HD1033 | <i>argH</i> | argininosuccinate lyase                                              | 0.82 | 0.11 |

|        |              |                                                                          |      |      |
|--------|--------------|--------------------------------------------------------------------------|------|------|
| HD1473 | <i>tdk</i>   | thymidine kinase                                                         | 0.82 | 0.09 |
| HD1961 | <i>rpsE</i>  | 30S ribosomal protein S5                                                 | 0.82 | 0.12 |
| HD1895 |              | putative adhesin processing HmwC-like protein                            | 0.82 | 0.13 |
| HD1180 | <i>surA</i>  | survival protein SurA homolog                                            | 0.81 | 0.11 |
| HD0357 |              | probable carbon starvation protein A                                     | 0.81 | 0.08 |
| HD1589 | <i>nlpI</i>  | lipoprotein NlpI homolog                                                 | 0.81 | 0.07 |
| HD0830 | <i>ligA</i>  | DNA ligase                                                               | 0.81 | 0.14 |
| HD0419 |              | conserved putative sodium-dependent transporter                          | 0.80 | 0.07 |
| HD0615 | <i>nfrE</i>  | cytochrome c-type biogenesis protein                                     | 0.80 | 0.09 |
| HD0394 |              | hypothetical protein                                                     | 0.80 | 0.16 |
| HD0827 | <i>ampG</i>  | permease and possible signal transducer                                  | 0.79 | 0.09 |
| HD1756 |              | putative xanthine/uracil permease                                        | 0.77 | 0.14 |
| HD0244 | <i>mraY</i>  | phospho-N-acetylmuramoyl-pentapeptide-transferase E                      | 0.77 | 0.07 |
| HD1816 | <i>yfeA</i>  | iron (chelated) ABC transporter, periplasmic-binding protein             | 0.77 | 0.09 |
| HD1923 | <i>rpoZ</i>  | RNA polymerase omega subunit                                             | 0.75 | 0.12 |
| HD1654 |              | conserved hypothetical protein                                           | 0.75 | 0.14 |
| HD1460 | <i>rbfA</i>  | ribosome binding factor A                                                | 0.75 | 0.09 |
| HD1745 | <i>uup</i>   | ABC-type transport protein Uup                                           | 0.74 | 0.11 |
| HD1962 | <i>rplR</i>  | 50S ribosomal protein L18                                                | 0.74 | 0.10 |
| HD2013 | <i>lipB</i>  | lipoate-protein ligase B                                                 | 0.74 | 0.07 |
| HD1459 | <i>truB</i>  | tRNA pseudouridine synthase B                                            | 0.73 | 0.10 |
| HD1785 | <i>groES</i> | 10 kDa chaperonin                                                        | 0.73 | 0.13 |
| HD1803 | <i>thrS</i>  | threonyl-tRNA synthetase                                                 | 0.73 | 0.09 |
| HD1784 | <i>groEL</i> | 60 kDa chaperonin                                                        | 0.73 | 0.13 |
| HD0411 | <i>recX</i>  | possible regulatory protein RecX homolog                                 | 0.72 | 0.10 |
| HD1939 |              | conserved hypothetical protein                                           | 0.72 | 0.17 |
| HD1463 |              | conserved hypothetical protein                                           | 0.70 | 0.10 |
| HD1469 | <i>cpxR</i>  | transcriptional regulatory protein CpxR                                  | 0.70 | 0.12 |
| HD0396 | <i>rmfA</i>  | probable Na <sup>+</sup> -translocating NADH-quinone oxidoreductase      | 0.68 | 0.14 |
| HD0226 |              | conserved hypothetical protein                                           | 0.66 | 0.14 |
| HD1604 | <i>recO</i>  | DNA repair protein RecO                                                  | 0.66 | 0.10 |
| HD0605 | <i>folK</i>  | 2-amino-4-hydroxy-6-hydroxymethylidihydropteridine pyrophosphokinase     | 0.64 | 0.11 |
| HD1606 | <i>rnc</i>   | ribonuclease III                                                         | 0.64 | 0.12 |
| HD0567 |              | hypothetical protein                                                     | 0.63 | 0.07 |
| HD1605 | <i>era</i>   | GTP-binding protein era homolog                                          | 0.63 | 0.10 |
| HD1331 | <i>pckA</i>  | phosphoenolpyruvate carboxykinase                                        | 0.62 | 0.09 |
| HD0379 | <i>nqrA</i>  | Na <sup>+</sup> -translocating NADH-ubiquinone oxidoreductase, subunit A | 0.61 | 0.08 |
| HD0260 | <i>degP</i>  | periplasmic serine protease                                              | 0.60 | 0.09 |
| HD0189 | <i>dnaK</i>  | chaperone protein DnaK                                                   | 0.60 | 0.07 |
| HD1410 |              | conserved hypothetical protein                                           | 0.56 | 0.10 |
| HD1472 |              | conserved hypothetical protein                                           | 0.55 | 0.14 |
| HD0771 |              | conserved hypothetical protein                                           | 0.54 | 0.10 |

|        |              |                                                    |       |      |
|--------|--------------|----------------------------------------------------|-------|------|
| HD1024 | <i>yfeD</i>  | iron (chelated) transport system membrane protein  | 0.52  | 0.13 |
| HD1249 | <i>rplY</i>  | 50S ribosomal protein L25                          | 0.48  | 0.11 |
| HD1443 |              | putative single stranded DNA-binding protein       | 0.48  | 0.13 |
| HD1237 | <i>lolA</i>  | outer membrane lipoprotein carrier protein         | 0.30  | 0.11 |
| HD1020 |              | glyoxalase II family protein                       | -0.33 | 0.10 |
| HD1016 |              | hypothetical protein                               | -0.42 | 0.09 |
| HD0361 | <i>infA</i>  | translation initiation factor IF-1                 | -0.42 | 0.12 |
| HD0222 |              | conserved hypothetical protein                     | -0.44 | 0.11 |
| HD1105 |              | conserved hypothetical protein                     | -0.45 | 0.11 |
| HD0903 | <i>cdtB</i>  | cytolethal distending toxin protein B              | -0.48 | 0.09 |
| HD1111 | <i>fdnI</i>  | formate dehydrogenase, gamma subunit               | -0.49 | 0.08 |
| HD1935 | <i>holB</i>  | DNA polymerase III delta subunit                   | -0.56 | 0.09 |
| HD1798 |              | hypothetical protein                               | -0.57 | 0.07 |
| HD0786 | <i>ccmA</i>  | cytochrome c-type biogenesis ATP-binding protein   | -0.57 | 0.11 |
| HD0014 | <i>mesJ</i>  | probable cell-cycle protein MesJ                   | -0.58 | 0.09 |
| HD0846 | <i>lpxB</i>  | lipid-A-disaccharide synthase                      | -0.59 | 0.14 |
| HD1212 | <i>smpA</i>  | small protein A                                    | -0.60 | 0.13 |
| HD0700 |              | putative peroxiredoxin/glutaredoxin family protein | -0.60 | 0.12 |
| HD1665 |              | possible GTP cyclohydrolase I                      | -0.60 | 0.15 |
| HD0004 | <i>atpB</i>  | ATP synthase A chain                               | -0.63 | 0.09 |
| HD1632 |              | conserved hypothetical protein                     | -0.64 | 0.07 |
| HD1170 | <i>ompP4</i> | outer membrane protein P4                          | -0.65 | 0.06 |
| HD0076 | <i>napG</i>  | ferredoxin-type protein NapG                       | -0.67 | 0.11 |
| HD1493 | <i>rpsI</i>  | 30S ribosomal protein S9                           | -0.69 | 0.13 |
| HD0169 | <i>ppa</i>   | inorganic pyrophosphatase                          | -0.69 | 0.15 |
| HD0902 | <i>cdtA</i>  | cytolethal distending toxin protein A              | -0.69 | 0.12 |
| HD0161 |              | hypothetical protein                               | -0.69 | 0.14 |
| HD1218 |              | hypothetical protein                               | -0.69 | 0.17 |
| HD0901 |              | hypothetical protein                               | -0.70 | 0.05 |
| HD1141 |              | conserved hypothetical protein                     | -0.70 | 0.09 |
| HD1332 | <i>LapB</i>  | putative membrane protein                          | -0.71 | 0.12 |
| HD1494 | <i>rplM</i>  | 50S ribosomal protein L13                          | -0.72 | 0.09 |
| HD1892 |              | conserved hypothetical protein                     | -0.73 | 0.10 |
| HD0595 |              | conserved hypothetical protein                     | -0.76 | 0.09 |
| HD1053 | <i>ndk</i>   | nucleoside diphosphate kinase                      | -0.78 | 0.09 |
| HD1018 | <i>macA</i>  | probable macrolide-specific efflux protein         | -0.81 | 0.07 |
| HD0624 | <i>alr</i>   | alanine racemase                                   | -0.83 | 0.08 |
| HD1917 |              | probable RNA polymerase sigma factor               | -0.84 | 0.09 |
| HD1666 |              | probable phosphatase                               | -0.84 | 0.12 |
| HD1029 |              | putative haloacid dehalogenase-like hydrolase      | -0.84 | 0.05 |
| HD1667 | <i>bcp</i>   | bacterioferritin comigratory protein               | -0.85 | 0.09 |
| HD0668 |              | hypothetical protein                               | -0.86 | 0.09 |

|        |              |                                                             |       |      |
|--------|--------------|-------------------------------------------------------------|-------|------|
| HD1211 |              | hypothetical protein                                        | -0.87 | 0.17 |
| HD1377 |              | conserved hypothetical protein                              | -0.87 | 0.20 |
| HD1545 |              | hypothetical protein                                        | -0.89 | 0.15 |
| HD0229 | <i>ptsH</i>  | PTS system phosphocarrier protein HPr                       | -0.89 | 0.12 |
| HD0479 |              | possible DNA-binding protein                                | -0.90 | 0.09 |
| HD0741 | <i>hfq</i>   | putative host factor-I protein                              | -0.90 | 0.10 |
| HD1302 | <i>tadC</i>  | tight adherence protein C                                   | -0.91 | 0.10 |
| HD1515 |              | conserved hypothetical protein                              | -0.91 | 0.13 |
| HD1783 |              | hypothetical protein                                        | -0.92 | 0.19 |
| HD1495 |              | conserved hypothetical protein                              | -0.93 | 0.22 |
| HD1393 | <i>torY</i>  | cytochrome c-type protein TorY                              | -0.93 | 0.06 |
| HD0848 | <i>sodC</i>  | superoxide dismutase [Cu-Zn]                                | -0.94 | 0.10 |
| HD0923 |              | hypothetical protein                                        | -0.95 | 0.18 |
| HD1600 | <i>rpsB</i>  | 30S ribosomal protein S2                                    | -0.96 | 0.08 |
| HD0591 |              | conserved hypothetical protein                              | -1.01 | 0.29 |
| HD1859 |              | PTS system Enzyme II-A permease component                   | -1.01 | 0.07 |
| HD0667 | <i>holC</i>  | DNA polymerase III chi subunit                              | -1.02 | 0.07 |
| HD1030 | <i>cysB</i>  | cys regulon transcriptional activator                       | -1.03 | 0.09 |
| HD0770 |              | conserved hypothetical protein                              | -1.04 | 0.13 |
| HD1754 | <i>ftnA</i>  | ferritin-like protein 1                                     | -1.06 | 0.10 |
| HD1945 |              | conserved hypothetical protein                              | -1.06 | 0.08 |
| HD1115 | <i>nth</i>   | endonuclease III, DNA (apurinic or apyrimidinic site) lyase | -1.07 | 0.09 |
| HD0073 | <i>napD</i>  | possible NapD protein                                       | -1.08 | 0.05 |
| HD1755 | <i>ftnB</i>  | ferritin-like protein 2                                     | -1.09 | 0.08 |
| HD0646 |              | conserved hypothetical protein                              | -1.09 | 0.16 |
| HD1078 | <i>ompP1</i> | outer membrane protein P1                                   | -1.10 | 0.05 |
| HD0072 | <i>napF</i>  | ferredoxin-type protein NapF                                | -1.14 | 0.09 |
| HD1028 | <i>gcvA</i>  | glycine cleavage system transcriptional activator           | -1.16 | 0.06 |
| HD1387 |              | conserved hypothetical protein                              | -1.18 | 0.08 |
| HD0084 | <i>lldD</i>  | L-lactate dehydrogenase                                     | -1.18 | 0.09 |
| HD0068 | <i>ftpA</i>  | fine tangled pili major subunit                             | -1.19 | 0.08 |
| HD1156 | <i>lspA2</i> | large supernatant protein 2                                 | -1.19 | 0.12 |
| HD1304 | <i>tadA</i>  | tight adherence protein A                                   | -1.20 | 0.12 |
| HD1327 | <i>hhdA</i>  | hemolysin                                                   | -1.25 | 0.06 |
| HD1077 | <i>ogt</i>   | methylated-DNA--protein-cysteine S-methyltransferase        | -1.25 | 0.07 |
| HD1480 | <i>bioD1</i> | probable dethiobiotin synthetase                            | -1.28 | 0.07 |
| HD1530 |              | hypothetical protein                                        | -1.29 | 0.14 |
| HD1857 | <i>sgaH</i>  | probable hexulose-6-phosphate synthase                      | -1.29 | 0.05 |
| HD1503 | <i>guaB</i>  | inosine-5-monophosphate dehydrogenase                       | -1.31 | 0.05 |
| HD1326 | <i>hhdB</i>  | hemolysin activation/secretion protein                      | -1.37 | 0.44 |
| HD1525 | <i>gam</i>   | putative mu-phage host-nuclease inhibitor protein           | -1.38 | 0.10 |
| HD1305 |              | <i>flp</i> operon protein D                                 | -1.39 | 0.09 |
| HD1291 | <i>gapA</i>  | glyceraldehyde 3-phosphate dehydrogenase                    | -1.41 | 0.13 |

|        |               |                                              |       |      |
|--------|---------------|----------------------------------------------|-------|------|
| HD0740 | <i>hflX</i>   | GTP-binding protein HflX                     | -1.46 | 0.12 |
| HD1986 | <i>fumC</i>   | fumarate hydratase class II                  | -1.46 | 0.05 |
| HD0925 |               | hypothetical protein                         | -1.49 | 0.11 |
| HD1290 | <i>msrB</i>   | peptide methionine sulfoxide reductase MsrB  | -1.50 | 0.11 |
| HD1389 | <i>moaE</i>   | molybdopterin converting factor subunit 2    | -1.50 | 0.56 |
| HD1306 | <i>rcpB</i>   | rough colony protein B                       | -1.53 | 0.13 |
| HD1920 |               | hypothetical protein                         | -1.54 | 0.12 |
| HD1391 | <i>moaC</i>   | molybdenum cofactor biosynthesis protein C   | -1.57 | 0.55 |
| HD0600 |               | conserved hypothetical protein               | -1.58 | 0.09 |
| HD1280 |               | possible serine protease homolog             | -1.63 | 0.11 |
| HD1096 |               | hypothetical protein                         | -1.64 | 0.26 |
| HD1390 | <i>moaD</i>   | molybdopterin converting factor subunit 1    | -1.66 | 0.62 |
| HD0066 |               | hypothetical protein                         | -1.78 | 0.58 |
| HD1392 | <i>moaA</i>   | molybdenum cofactor biosynthesis protein A   | -1.80 | 0.52 |
| HD1307 | <i>rcpA</i>   | rough colony protein A                       | -1.83 | 0.20 |
| HD1518 |               | hypothetical protein                         | -1.85 | 0.67 |
| HD0347 | <i>nrfB</i>   | nitrate reductase, cytochrome-C type protein | -1.92 | 0.25 |
| HD1432 |               | conserved hypothetical protein               | -1.98 | 0.07 |
| HD1308 |               | <i>flp</i> operon protein C                  | -2.06 | 0.09 |
| HD0344 | <i>nrfA</i>   | nitrate reductase, cytochrome c552           | -2.12 | 0.19 |
| HD1309 |               | <i>flp</i> operon protein B                  | -2.43 | 0.45 |
| HD1278 |               | possible serine protease                     | -2.51 | 0.87 |
| HD1856 |               | hypothetical protein                         | -2.54 | 0.50 |
| HD0896 | <i>cysK</i>   | cysteine synthase                            | -2.56 | 0.12 |
| HD0047 |               | hypothetical protein not likely              | -2.69 | 0.16 |
| HD1312 | <i>flp1</i>   | <i>flp</i> operon protein Flp1               | -2.85 | 0.94 |
| HD0998 | <i>uraA</i>   | uracil permease                              | -2.92 | 0.26 |
| HD0048 |               | hypothetical protein                         | -3.05 | 0.26 |
| HD0232 | <i>arcB1</i>  | ornithine carbamoyltransferase               | -3.10 | 0.13 |
| HD1310 | <i>flp3</i>   | <i>flp</i> operon protein Flp3               | -3.10 | 0.66 |
| HD1311 | <i>flp2</i>   | <i>flp</i> operon protein Flp2               | -3.11 | 0.71 |
| HD1985 |               | possible DNA transformation protein          | -3.16 | 0.61 |
| HD0233 | <i>carB</i>   | carbamoyl-phosphate synthase, large subunit  | -3.34 | 0.21 |
| HD0235 | <i>carA</i>   | carbamoyl-phosphate synthase, small subunit  | -3.63 | 0.26 |
| HD0769 | <i>dsrA</i>   | serum resistance protein DrsA                | -3.68 | 0.15 |
| HD0805 |               | conserved hypothetical protein               | -3.70 | 1.52 |
| HD0046 | <i>ompA2</i>  | major outer membrane protein homolog, OmpA2  | -4.61 | 0.10 |
| HD1433 | <i>ompP2A</i> | outer membrane protein P2 homolog            | -4.68 | 0.35 |

<sup>a</sup> Median log<sub>2</sub> ratio of expression comparing 35000HPΔ*cpxA* to 35000HP from three independent experiments ( $p < 0.05$ ).
