# Supplementary material
Source: PubMed Central journal article supplement (PMC2976327)
Supplement: supp_78_11_4779__2.pdf [file supp_78_11_4779__2.pdf]

**Table S2. Genes whose expression is most affected by the overexpression of CpxR.**

| ORF    | Gene         | Description                                           | A <sup>a</sup> | SD   |
|--------|--------------|-------------------------------------------------------|----------------|------|
| HD1109 |              | putative oxalate/formate antiporter                   | 3.90           | 0.25 |
| HD0281 | <i>fimA</i>  | possible fimbrial major pilin protein                 | 3.62           | 0.41 |
| HD0282 | <i>fimB</i>  | possible fimbrial structural subunit                  | 3.16           | 0.41 |
| HD1640 |              | hypothetical protein                                  | 3.06           | 0.34 |
| HD0283 | <i>fimC</i>  | probable fimbrial outer membrane usher protein        | 2.80           | 0.41 |
| HD0262 | <i>argR</i>  | arginine repressor                                    | 2.46           | 0.32 |
| HD0261 |              | conserved hypothetical protein                        | 2.45           | 0.35 |
| HD0284 | <i>fimD</i>  | probable periplasmic fimbrial chaperone               | 2.27           | 0.31 |
| HD1815 |              | putative sulfite reductase                            | 2.27           | 0.25 |
| HD0025 | <i>dcuB1</i> | anaerobic C4-dicarboxylate transporter                | 2.24           | 0.30 |
| HD0811 | <i>artP</i>  | arginine ABC transporter, ATP-binding protein         | 2.16           | 0.67 |
| HD1325 |              | conserved hypothetical protein                        | 2.13           | 0.23 |
| HD1512 |              | acriflavine resistance protein                        | 2.12           | 0.41 |
| HD0564 | <i>aspA</i>  | aspartate ammonia-lyase                               | 2.11           | 0.33 |
| HD2016 | <i>dacA</i>  | penicillin-binding protein 5                          | 2.02           | 0.28 |
| HD0614 | <i>kefB</i>  | glutathione-regulated potassium-efflux system protein | 2.00           | 0.19 |
| HD1814 |              | probable transport protein                            | 1.89           | 0.17 |
| HD0285 |              | possible minor fimbrial subunit                       | 1.86           | 0.17 |
| HD0097 |              | conserved hypothetical protein                        | 1.72           | 0.18 |
| HD2017 |              | possible rare lipoprotein A                           | 1.72           | 0.23 |
| HD1282 | <i>fhs</i>   | putative formate--tetrahydrofolate ligase             | 1.71           | 0.14 |
| HD0351 | <i>prfC</i>  | peptide chain release factor 3                        | 1.65           | 0.23 |
| HD0189 | <i>dnaK</i>  | chaperone protein DnaK                                | 1.61           | 0.20 |
| HD2012 | <i>lipA</i>  | lipoic acid synthetase                                | 1.60           | 0.38 |
| HD0286 |              | hypothetical protein                                  | 1.60           | 0.33 |
| HD0812 | <i>artI</i>  | arginine ABC transporter, periplasmic-binding protein | 1.60           | 0.31 |
| HD1084 |              | HesB family protein                                   | 1.59           | 0.29 |
| HD1161 | <i>ribD</i>  | riboflavin-specific deaminase                         | 1.58           | 0.31 |
| HD0338 |              | hypothetical protein                                  | 1.57           | 0.21 |
| HD2015 |              | conserved hypothetical protein                        | 1.57           | 0.23 |
| HD1163 | <i>ribAB</i> | riboflavin biosynthesis protein RibA                  | 1.56           | 0.30 |
| HD0266 | <i>lpp</i>   | 15kd outer membrane lipoprotein                       | 1.55           | 0.24 |
| HD0565 | <i>clpB</i>  | ATP-dependant Clp protease chain B                    | 1.51           | 0.18 |
| HD0287 |              | hypothetical protein                                  | 1.51           | 0.19 |
| HD0337 | <i>rluB</i>  | probable pseudouridylate synthase                     | 1.49           | 0.22 |
| HD0876 |              | conserved probable ribonuclease                       | 1.46           | 0.20 |
| HD0096 |              | hypothetical protein                                  | 1.46           | 0.27 |
| HD1142 | <i>sdaA</i>  | L-serine dehydratase                                  | 1.44           | 0.28 |
| HD1513 |              | putative RND efflux membrane fusion protein           | 1.44           | 0.34 |
| HD2013 | <i>lipB</i>  | lipoate-protein ligase B                              | 1.43           | 0.27 |

|        |              |                                                          |      |      |
|--------|--------------|----------------------------------------------------------|------|------|
| HD0098 |              | hypothetical protein                                     | 1.42 | 0.23 |
| HD0767 | <i>manY</i>  | mannose-specific phosphotransferase system IIC component | 1.41 | 0.26 |
| HD0766 | <i>manZ</i>  | mannose-specific phosphotransferase system IID component | 1.40 | 0.25 |
| HD0988 | <i>prlC</i>  | oligopeptidase A                                         | 1.39 | 0.19 |
| HD0765 | <i>manA</i>  | mannose-6-phosphate isomerase                            | 1.39 | 0.33 |
| HD1343 |              | hypothetical protein                                     | 1.38 | 0.30 |
| HD2014 |              | hypothetical protein                                     | 1.32 | 0.24 |
| HD1076 | <i>recB</i>  | exodeoxyribonuclease V, beta subunit                     | 1.31 | 0.17 |
| HD0738 | <i>crp</i>   | cyclic AMP receptor protein                              | 1.31 | 0.18 |
| HD1165 | <i>ribH</i>  | 6,7-dimethyl-8-ribityllumazine synthase                  | 1.28 | 0.25 |
| HD1400 |              | putative soluble lytic murein transglycosylase           | 1.27 | 0.19 |
| HD1354 |              | conserved hypothetical protein                           | 1.27 | 0.26 |
| HD1654 |              | conserved hypothetical protein                           | 1.26 | 0.23 |
| HD0090 | <i>ner</i>   | possible DNA-binding protein                             | 1.24 | 0.26 |
| HD1786 | <i>mutT</i>  | mutator MutT protein                                     | 1.22 | 0.16 |
| HD0400 | <i>rnfD</i>  | putative Na-translocating NADH-quinone reductase         | 1.21 | 0.25 |
| HD1994 | <i>selA</i>  | L-seryl-tRNA (Sec) selenium transferase                  | 1.21 | 0.23 |
| HD0313 | <i>dppC</i>  | dipeptide transport system permease protein              | 1.20 | 0.23 |
| HD1073 | <i>grpE</i>  | heat shock protein GrpE                                  | 1.20 | 0.25 |
| HD0108 |              | hypothetical protein                                     | 1.20 | 0.14 |
| HD0889 | <i>deoD</i>  | purine nucleoside phosphorylase                          | 1.19 | 0.24 |
| HD1202 | <i>WaaQ</i>  | ADP-heptose--lipooligosaccharide heptosyltransferase III | 1.18 | 0.25 |
| HD0264 | <i>mdh</i>   | malate dehydrogenase                                     | 1.17 | 0.21 |
| HD1817 | <i>yfeB</i>  | iron (chelated) transporter, ATP-binding protein         | 1.15 | 0.31 |
| HD1655 |              | conserved hypothetical protein                           | 1.14 | 0.35 |
| HD1075 | <i>norM</i>  | multidrug resistance protein NorM                        | 1.14 | 0.22 |
| HD0472 | <i>lgtB</i>  | lipooligosaccharide galactosyltransferase II             | 1.13 | 0.24 |
| HD0188 | <i>dnaJ</i>  | chaperone protein DnaJ                                   | 1.13 | 0.25 |
| HD1143 | <i>sdaC</i>  | serine transporter                                       | 1.12 | 0.27 |
| HD1088 | <i>fdx2</i>  | ferredoxin                                               | 1.11 | 0.28 |
| HD1146 | <i>glpF</i>  | glycerol uptake facilitator protein                      | 1.11 | 0.33 |
| HD1089 |              | conserved hypothetical protein                           | 1.09 | 0.27 |
| HD0783 | <i>oadA</i>  | oxaloacetate decarboxylase alpha chain                   | 1.09 | 0.20 |
| HD1784 | <i>groEL</i> | 60 kDa chaperonin                                        | 1.09 | 0.21 |
| HD0404 | <i>lpxM</i>  | lipid A acyltransferase                                  | 1.09 | 0.22 |
| HD0177 | <i>trpS</i>  | tryptophanyl-tRNA synthetase                             | 1.08 | 0.13 |
| HD1507 | <i>manB</i>  | probable phosphomannomutase                              | 1.08 | 0.23 |
| HD0403 | <i>rnfE</i>  | probable Na-translocating NADH-quinone reductase         | 1.07 | 0.21 |
| HD2006 | <i>hslV</i>  | ATP-dependent protease HslV                              | 1.06 | 0.23 |
| HD1074 | <i>potD2</i> | spermidine/putrescine-binding periplasmic protein        | 1.06 | 0.19 |
| HD0181 | <i>fabA</i>  | 3-hydroxydecanoyl-(acyl-carrier protein) dehydratase     | 1.05 | 0.25 |
| HD0768 | <i>manX</i>  | mannose-specific phosphotransferase IIAB component       | 1.05 | 0.22 |
| HD1011 |              | hypothetical protein                                     | 1.05 | 0.25 |

|        |             |                                                         |      |      |
|--------|-------------|---------------------------------------------------------|------|------|
| HD1254 |             | putative Na/dicarboxylate symporter                     | 1.04 | 0.15 |
| HD0095 |             | Mu phage DNA transposition protein B                    | 1.04 | 0.25 |
| HD0816 | <i>lpxC</i> | UDP-3-O-acyl-GlcNAc deacetylase                         | 1.03 | 0.25 |
| HD1205 |             | conserved hypothetical protein                          | 1.03 | 0.21 |
| HD2007 | <i>hslU</i> | ATP-dependent hsl protease ATP-binding subunit HslU     | 1.01 | 0.24 |
| HD0176 | <i>gph</i>  | phosphoglycolate phosphatase                            | 1.01 | 0.23 |
| HD1853 | <i>menD</i> | menaquinone biosynthesis protein                        | 1.01 | 0.23 |
| HD1355 |             | conserved hypothetical protein                          | 1.00 | 0.25 |
| HD1766 | <i>moeB</i> | molybdopterin biosynthesis protein MoeB                 | 0.99 | 0.24 |
| HD1087 | <i>hscA</i> | chaperone protein HscA                                  | 0.99 | 0.25 |
| HD0687 | <i>rmlB</i> | dTDP-D-glucose 4,6-dehydratase                          | 0.97 | 0.17 |
| HD0470 |             | conserved putative lipoprotein                          | 0.97 | 0.23 |
| HD1511 | <i>glmU</i> | bifunctional GlmU protein                               | 0.96 | 0.23 |
| HD0697 |             | thioredoxin-like protein                                | 0.95 | 0.27 |
| HD1085 | <i>hscB</i> | chaperone protein HscB                                  | 0.94 | 0.24 |
| HD0419 |             | conserved putative sodium-dependent transporter         | 0.94 | 0.16 |
| HD0475 | <i>recQ</i> | ATP-dependent DNA helicase                              | 0.94 | 0.20 |
| HD1086 |             | conserved hypothetical protein                          | 0.94 | 0.26 |
| HD0725 |             | conserved hypothetical protein                          | 0.93 | 0.26 |
| HD1353 | <i>ihfB</i> | integration host factor, beta subunit                   | 0.93 | 0.21 |
| HD1083 | <i>iscU</i> | NifU protein homolog                                    | 0.92 | 0.21 |
| HD1180 | <i>surA</i> | survival protein SurA homolog                           | 0.92 | 0.23 |
| HD1160 | <i>glpC</i> | anaerobic glycerol-3-phosphate dehydrogenase, subunit C | 0.89 | 0.23 |
| HD0989 | <i>pflA</i> | pyruvate formate-lyase activating enzyme                | 0.89 | 0.22 |
| HD1007 | <i>bioB</i> | biotin synthetase                                       | 0.89 | 0.24 |
| HD1471 |             | conserved hypothetical protein                          | 0.87 | 0.24 |
| HD1706 |             | conserved hypothetical protein                          | 0.87 | 0.23 |
| HD0001 | <i>gidA</i> | glucose inhibited division protein A                    | 0.86 | 0.23 |
| HD1747 |             | hypothetical protein                                    | 0.86 | 0.25 |
| HD0835 |             | putative transport protein                              | 0.85 | 0.23 |
| HD0892 | <i>argD</i> | acetylornithine aminotransferase                        | 0.85 | 0.19 |
| HD1810 | <i>trxA</i> | thioredoxin                                             | 0.84 | 0.25 |
| HD0408 | <i>pabB</i> | p-aminobenzoate synthase component I                    | 0.82 | 0.21 |
| HD0174 | <i>lgt</i>  | prolipoprotein diacylglyceryl transferase               | 0.81 | 0.21 |
| HD1854 |             | conserved hypothetical protein                          | 0.81 | 0.20 |
| HD1824 | <i>modB</i> | molybdenum ABC transporter, permease protein            | 0.81 | 0.20 |
| HD1256 | <i>rec2</i> | recombination protein 2                                 | 0.80 | 0.17 |
| HD1540 |             | hypothetical protein                                    | 0.80 | 0.21 |
| HD1286 | <i>uvrA</i> | excinuclease ABC subunit A                              | 0.79 | 0.23 |
| HD1173 | <i>rseA</i> | possible sigma-E factor negative regulatory protein     | 0.79 | 0.24 |
| HD0723 | <i>trmA</i> | tRNA (uracil-5-)-methyltransferase                      | 0.79 | 0.32 |
| HD0300 | <i>grxA</i> | glutaredoxin                                            | 0.79 | 0.24 |
| HD0890 | <i>argC</i> | N-acetyl-gamma-glutamyl-phosphate reductase             | 0.78 | 0.17 |

|        |             |                                                 |       |      |
|--------|-------------|-------------------------------------------------|-------|------|
| HD1705 |             | putative coproporphyrinogen III oxidase         | 0.77  | 0.22 |
| HD0647 |             | conserved hypothetical protein                  | 0.77  | 0.22 |
| HD0706 |             | conserved hypothetical protein                  | 0.73  | 0.19 |
| HD1820 |             | putative ABC transporter, ATP-binding protein   | 0.71  | 0.17 |
| HD0545 | <i>lexA</i> | probable LexA repressor                         | 0.70  | 0.20 |
| HD1825 |             | hypothetical protein                            | 0.70  | 0.20 |
| HD0040 | <i>yidC</i> | 60 kD inner-membrane protein                    | 0.69  | 0.22 |
| HD1992 | <i>sun</i>  | SUN protein                                     | 0.69  | 0.17 |
| HD0372 | <i>ansB</i> | L-asparaginase II                               | 0.68  | 0.22 |
| HD1753 | <i>secF</i> | protein-export membrane protein SecF            | 0.68  | 0.22 |
| HD1296 |             | conserved hypothetical protein                  | 0.67  | 0.18 |
| HD0615 | <i>nfrE</i> | cytochrome c-type biogenesis protein            | 0.64  | 0.22 |
| HD0544 | <i>mutH</i> | DNA mismatch repair protein                     | 0.63  | 0.24 |
| HD0054 | <i>tufA</i> | elongation factor tu, EF-Tu                     | 0.60  | 0.23 |
| HD0034 | <i>frdD</i> | fumarate reductase, 13 kD hydrophobic protein   | 0.58  | 0.17 |
| HD0891 | <i>argB</i> | acetylglutamate kinase                          | 0.58  | 0.20 |
| HD1247 | <i>maeA</i> | malate oxidoreductase (NAD)                     | 0.57  | 0.20 |
| HD0838 | <i>zwf</i>  | glucose-6-phosphate 1-dehydrogenase             | 0.51  | 0.18 |
| HD1767 | <i>moeA</i> | molybdopterin biosynthesis protein MoeA         | 0.51  | 0.16 |
| HD1826 | <i>modC</i> | molybdenum ABC transporter, ATP-binding protein | 0.48  | 0.17 |
| HD1991 | <i>trkA</i> | TRK system potassium uptake protein             | 0.46  | 0.17 |
| HD1186 | <i>dxr</i>  | 1-deoxy-D-xylulose 5-phosphate reductoisomerase | 0.45  | 0.15 |
| HD1417 |             | hypothetical protein                            | 0.43  | 0.19 |
| HD0688 | <i>rmlA</i> | glucose-1-phosphate thymidyltransferase         | 0.42  | 0.13 |
| HD0815 | <i>recN</i> | DNA repair protein                              | 0.40  | 0.18 |
| HD0436 | <i>thiL</i> | thiamin-monophosphate kinase                    | -0.48 | 0.18 |
| HD1911 | <i>asnC</i> | transcription regulatory protein, AsnC          | -0.60 | 0.18 |
| HD1014 |             | hypothetical protein                            | -0.61 | 0.16 |
| HD0435 | <i>nusB</i> | transcription termination factor                | -0.61 | 0.18 |
| HD1780 |             | hypothetical protein                            | -0.63 | 0.19 |
| HD0365 |             | conserved hypothetical protein                  | -0.66 | 0.15 |
| HD0575 | <i>prfB</i> | peptide chain release factor 2                  | -0.68 | 0.16 |
| HD0455 |             | putative protease                               | -0.74 | 0.18 |
| HD1625 | <i>aceE</i> | 2-oxoglutarate dehydrogenase                    | -0.79 | 0.18 |
| HD0010 | <i>atpD</i> | ATP synthase beta chain                         | -0.80 | 0.21 |
| HD1809 | <i>hflK</i> | HflK protein                                    | -0.80 | 0.18 |
| HD0081 | <i>murB</i> | UDP-N-acetylenolpyruvoylglucosamine reductase   | -0.84 | 0.19 |
| HD0257 |             | conserved hypothetical protein                  | -0.84 | 0.20 |
| HD1892 |             | conserved hypothetical protein                  | -0.85 | 0.24 |
| HD0426 | <i>mrcA</i> | penicillin-binding protein 1A                   | -0.86 | 0.20 |
| HD1271 | <i>menE</i> | O-succinylbenzoic acid--CoA ligase              | -0.87 | 0.19 |
| HD0008 | <i>atpA</i> | ATP synthase alpha chain                        | -0.87 | 0.20 |

|        |              |                                                    |       |      |
|--------|--------------|----------------------------------------------------|-------|------|
| HD1779 |              | hypothetical protein                               | -0.91 | 0.19 |
| HD0874 | <i>ndh</i>   | NADH dehydrogenase                                 | -0.92 | 0.18 |
| HD0258 |              | probable permease                                  | -0.93 | 0.26 |
| HD1219 |              | conserved hypothetical protein                     | -0.94 | 0.22 |
| HD1893 |              | hypothetical protein                               | -0.95 | 0.15 |
| HD0580 | <i>hlp</i>   | lipoprotein Hlp                                    | -0.96 | 0.18 |
| HD1016 |              | hypothetical protein                               | -0.96 | 0.18 |
| HD1902 |              | conserved hypothetical protein                     | -0.97 | 0.15 |
| HD0750 | <i>glnA</i>  | glutamine synthetase                               | -0.97 | 0.22 |
| HD1015 |              | hypothetical protein                               | -0.98 | 0.19 |
| HD1642 |              | possible integral membrane protein of DedA family  | -0.99 | 0.25 |
| HD1060 |              | hypothetical protein                               | -1.01 | 0.14 |
| HD0449 | <i>fis</i>   | DNA-binding protein                                | -1.02 | 0.19 |
| HD1759 | <i>pryE</i>  | orotate phosphoribosyltransferase                  | -1.03 | 0.13 |
| HD1104 | <i>truA</i>  | tRNA pseudouridine synthase A                      | -1.04 | 0.19 |
| HD1662 | <i>pntB</i>  | NAD(P) transhydrogenase, beta subunit              | -1.04 | 0.21 |
| HD1999 | <i>ffh</i>   | signal recognition particle protein                | -1.04 | 0.18 |
| HD0066 |              | hypothetical protein                               | -1.05 | 0.21 |
| HD1372 | <i>dnaB2</i> | replicative DNA helicase                           | -1.06 | 0.19 |
| HD1896 |              | conserved hypothetical protein                     | -1.06 | 0.22 |
| HD1485 | <i>frxA</i>  | NAD(P)H nitroreductase                             | -1.06 | 0.20 |
| HD0004 | <i>atpB</i>  | ATP synthase A chain                               | -1.06 | 0.24 |
| HD0009 | <i>atpG</i>  | ATP synthase gamma chain                           | -1.07 | 0.23 |
| HD1371 |              | conserved hypothetical protein                     | -1.07 | 0.24 |
| HD1118 | <i>folA</i>  | dihydrofolate reductase                            | -1.08 | 0.22 |
| HD0201 | <i>mrsA</i>  | phosphoglucosamine mutase                          | -1.09 | 0.23 |
| HD0821 | <i>ddlB</i>  | D-alanine-D-alanine ligase B                       | -1.10 | 0.14 |
| HD1103 | <i>folE</i>  | GTP cyclohydrolase I                               | -1.10 | 0.19 |
| HD1291 | <i>gapA</i>  | glyceraldehyde 3-phosphate dehydrogenase           | -1.10 | 0.26 |
| HD0007 | <i>atpH</i>  | ATP synthase delta chain                           | -1.10 | 0.21 |
| HD1379 |              | conserved hypothetical protein                     | -1.10 | 0.19 |
| HD1017 |              | hypothetical protein                               | -1.13 | 0.27 |
| HD0005 | <i>atpE</i>  | ATP synthase C chain                               | -1.13 | 0.19 |
| HD0440 | <i>suhB</i>  | inositol-1-monophosphatase                         | -1.15 | 0.15 |
| HD1727 | <i>fadR</i>  | fatty acid metabolism regulator protein            | -1.15 | 0.19 |
| HD0006 | <i>atpF</i>  | ATP synthase B chain                               | -1.15 | 0.21 |
| HD0448 |              | putative dehydrogenase                             | -1.15 | 0.25 |
| HD1468 | <i>mazG</i>  | MazG protein                                       | -1.16 | 0.23 |
| HD1728 | <i>nhaB</i>  | Na <sup>+</sup> /H <sup>+</sup> antiporter protein | -1.16 | 0.23 |
| HD1737 | <i>ppiD</i>  | peptidyl-prolyl cis-trans isomerase D              | -1.16 | 0.20 |
| HD1020 |              | glyoxalase II family protein                       | -1.18 | 0.18 |
| HD0668 |              | hypothetical protein                               | -1.18 | 0.23 |
| HD0194 | <i>rne</i>   | ribonuclease E                                     | -1.19 | 0.21 |

|        |              |                                                                                                                    |       |      |
|--------|--------------|--------------------------------------------------------------------------------------------------------------------|-------|------|
| HD1327 | <i>hhdA</i>  | hemolysin                                                                                                          | -1.20 | 0.11 |
| HD0441 | <i>dxs</i>   | 1-deoxyxylulose-5-phosphate synthase                                                                               | -1.20 | 0.15 |
| HD1411 | <i>asnS</i>  | asparaginyl-tRNA synthetase                                                                                        | -1.20 | 0.23 |
| HD1663 | <i>pntA</i>  | NAD(P) transhydrogenase, alpha subunit                                                                             | -1.20 | 0.19 |
| HD1857 | <i>sgaH</i>  | probable hexulose-6-phosphate synthase                                                                             | -1.21 | 0.21 |
| HD1369 |              | conserved hypothetical protein                                                                                     | -1.22 | 0.18 |
| HD0865 | <i>pgk</i>   | phosphoglycerate kinase                                                                                            | -1.24 | 0.18 |
| HD0042 |              | conserved hypothetical protein                                                                                     | -1.26 | 0.16 |
| HD0669 | <i>valS</i>  | valyl-tRNA synthetase                                                                                              | -1.26 | 0.19 |
| HD1782 | <i>cydA</i>  | cytochrome D ubiquinol oxidase, subunit I                                                                          | -1.27 | 0.21 |
| HD2025 | <i>hgbA</i>  | hemoglobin-binding protein HgbA                                                                                    | -1.27 | 0.28 |
| HD0581 | <i>HlpB</i>  | lipoprotein HlpB                                                                                                   | -1.30 | 0.18 |
| HD1220 | <i>ykgF</i>  | putative iron-sulfur electron transport protein                                                                    | -1.30 | 0.19 |
| HD1913 | <i>asnA</i>  | asparagine synthetase A                                                                                            | -1.30 | 0.27 |
| HD1859 |              | PTS system Enzyme II-A permease component                                                                          | -1.32 | 0.18 |
| HD0997 |              | hypothetical protein                                                                                               | -1.34 | 0.33 |
| HD1115 | <i>nth</i>   | endonuclease III, DNA (apurinic or apyrimidinic site) lyase                                                        | -1.35 | 0.21 |
| HD1456 | <i>ackA</i>  | acetate kinase                                                                                                     | -1.37 | 0.21 |
| HD0824 | <i>murG</i>  | UDP-N-acetylglucosamine-N-acetylmuramyl-(pentapeptide) pyrophosphoryl-undecaprenol N-acetylglucosamine transferase | -1.38 | 0.21 |
| HD0076 | <i>napG</i>  | ferredoxin-type protein NapG                                                                                       | -1.39 | 0.18 |
| HD0003 |              | conserved hypothetical protein                                                                                     | -1.39 | 0.27 |
| HD1428 | <i>uspA</i>  | universal stress protein A                                                                                         | -1.41 | 0.19 |
| HD0848 | <i>sodC</i>  | superoxide dismutase [Cu-Zn]                                                                                       | -1.42 | 0.25 |
| HD1735 |              | putative oligopeptide transporter, periplasmic-binding protein                                                     | -1.42 | 0.20 |
| HD0770 |              | conserved hypothetical protein                                                                                     | -1.42 | 0.21 |
| HD0646 |              | conserved hypothetical protein                                                                                     | -1.46 | 0.18 |
| HD1489 |              | hypothetical protein                                                                                               | -1.47 | 0.22 |
| HD1641 | <i>purR</i>  | purine nucleotide synthesis repressor                                                                              | -1.49 | 0.20 |
| HD1221 | <i>ykgE</i>  | conserved putative dehydrogenase subunit                                                                           | -1.51 | 0.16 |
| HD0074 | <i>napA</i>  | periplasmic nitrate reductase                                                                                      | -1.52 | 0.18 |
| HD0667 | <i>holC</i>  | DNA polymerase III chi subunit                                                                                     | -1.52 | 0.27 |
| HD0613 | <i>cyaA</i>  | adenylate cyclase                                                                                                  | -1.56 | 0.19 |
| HD1290 | <i>msrB</i>  | peptide methionine sulfoxide reductase MsrB                                                                        | -1.57 | 0.31 |
| HD1409 |              | conserved hypothetical protein                                                                                     | -1.59 | 0.21 |
| HD1494 | <i>rplM</i>  | 50S ribosomal protein L13                                                                                          | -1.60 | 0.20 |
| HD0349 | <i>nrfC</i>  | nitrate reductase, Fe-S protein                                                                                    | -1.60 | 0.36 |
| HD1299 | <i>tadF</i>  | tight adherence protein F                                                                                          | -1.62 | 0.16 |
| HD1493 | <i>rpsI</i>  | 30S ribosomal protein S9                                                                                           | -1.66 | 0.25 |
| HD1480 | <i>bioD1</i> | probable dethiobiotin synthetase                                                                                   | -1.66 | 0.30 |
| HD1986 | <i>fumC</i>  | fumarate hydratase class II                                                                                        | -1.68 | 0.22 |
| HD1666 |              | probable phosphatase                                                                                               | -1.68 | 0.24 |
| HD1253 | <i>dgkA</i>  | diacylglycerol kinase                                                                                              | -1.68 | 0.32 |

|        |              |                                                    |       |      |
|--------|--------------|----------------------------------------------------|-------|------|
| HD1298 | <i>tadG</i>  | tight adherence protein G                          | -1.69 | 0.16 |
| HD1860 | <i>sgaT</i>  | putative PTS system Enzyme II sga subunit          | -1.70 | 0.27 |
| HD1301 | <i>tadD</i>  | tight adherence protein D                          | -1.75 | 0.12 |
| HD1300 | <i>tadE</i>  | tight adherence protein E                          | -1.78 | 0.22 |
| HD1304 | <i>tadA</i>  | tight adherence protein A                          | -1.80 | 0.19 |
| HD1755 | <i>ftnB</i>  | ferritin-like protein 2                            | -1.80 | 0.26 |
| HD1303 | <i>tadB</i>  | tight adherence protein B                          | -1.80 | 0.21 |
| HD1387 |              | conserved hypothetical protein                     | -1.83 | 0.16 |
| HD1667 | <i>bcp</i>   | bacterioferritin comigratory protein               | -1.83 | 0.25 |
| HD1754 | <i>ftnA</i>  | ferritin-like protein 1                            | -1.84 | 0.25 |
| HD1030 | <i>cysB</i>  | <i>cys</i> regulon transcriptional activator       | -1.87 | 0.22 |
| HD1305 |              | <i>flp</i> operon protein D                        | -1.88 | 0.17 |
| HD1504 | <i>guaA</i>  | GMP synthase [glutamine-hydrolyzing]               | -1.92 | 0.25 |
| HD0347 | <i>nrfB</i>  | nitrate reductase, cytochrome-C type protein       | -1.94 | 0.32 |
| HD1280 |              | possible serine protease homolog                   | -1.94 | 0.29 |
| HD0073 | <i>napD</i>  | possible NapD protein                              | -1.98 | 0.15 |
| HD0577 | <i>selD</i>  | selenide, water dikinase                           | -1.99 | 0.16 |
| HD0072 | <i>napF</i>  | ferredoxin-type protein NapF                       | -2.01 | 0.19 |
| HD1389 | <i>moaE</i>  | molybdopterin converting factor subunit 2          | -2.03 | 0.15 |
| HD1407 | <i>efp</i>   | elongation factor P                                | -2.03 | 0.15 |
| HD1018 | <i>macA</i>  | probable macrolide-specific efflux protein         | -2.05 | 0.20 |
| HD0344 | <i>nrfA</i>  | nitrate reductase, cytochrome c552                 | -2.11 | 0.33 |
| HD1306 | <i>rcpB</i>  | rough colony protein B                             | -2.16 | 0.20 |
| HD1150 | <i>glpT</i>  | glycerol 3-phosphate transporter                   | -2.18 | 0.20 |
| HD1394 | <i>torZ</i>  | trimethylamine-N-oxide reductase 2                 | -2.20 | 0.16 |
| HD1302 | <i>tadC</i>  | tight adherence protein C                          | -2.20 | 0.14 |
| HD1029 |              | putative haloacid dehalogenase-like hydrolase      | -2.25 | 0.20 |
| HD1307 | <i>rcpA</i>  | rough colony protein A                             | -2.26 | 0.16 |
| HD0998 | <i>uraA</i>  | uracil permease                                    | -2.27 | 0.42 |
| HD0202 | <i>slyD</i>  | FkbP-type peptidyl-prolyl cis-trans isomerase      | -2.31 | 0.14 |
| HD1985 |              | possible DNA transformation protein                | -2.31 | 0.44 |
| HD1308 |              | <i>flp</i> operon protein C                        | -2.37 | 0.17 |
| HD1390 | <i>moaD</i>  | molybdopterin converting factor subunit 1          | -2.41 | 0.17 |
| HD1503 | <i>guaB</i>  | inosine-5-monophosphate dehydrogenase              | -2.43 | 0.17 |
| HD1028 | <i>gcvA</i>  | glycine cleavage system transcriptional activator  | -2.47 | 0.27 |
| HD1312 | <i>flp1</i>  | <i>flp</i> operon protein Flp1                     | -2.51 | 0.28 |
| HD1078 | <i>ompP1</i> | outer membrane protein P1                          | -2.56 | 0.18 |
| HD1856 |              | hypothetical protein                               | -2.58 | 0.29 |
| HD1151 |              | hypothetical protein                               | -2.60 | 0.26 |
| HD1900 | <i>fkpA</i>  | FKBP-type peptidyl-prolyl cis-trans isomerase FkpA | -2.61 | 0.15 |
| HD1393 | <i>torY</i>  | cytochrome c-type protein TorY                     | -2.68 | 0.18 |
| HD0233 | <i>carB</i>  | carbamoyl-phosphate synthase, large subunit        | -2.72 | 0.50 |
| HD0589 |              | conserved hypothetical protein                     | -2.90 | 0.26 |

|        |               |                                             |       |      |
|--------|---------------|---------------------------------------------|-------|------|
| HD1432 |               | conserved hypothetical protein              | -2.91 | 0.28 |
| HD1278 |               | possible serine protease                    | -2.92 | 0.26 |
| HD1156 | <i>lspA2</i>  | large supernatant protein 2                 | -2.95 | 0.20 |
| HD1309 |               | <i>flp</i> operon protein B                 | -2.95 | 0.22 |
| HD0084 | <i>lldD</i>   | L-lactate dehydrogenase                     | -2.98 | 0.31 |
| HD0590 |               | conserved hypothetical protein              | -2.99 | 0.21 |
| HD0805 |               | conserved hypothetical protein              | -3.04 | 0.31 |
| HD0235 | <i>carA</i>   | carbamoyl-phosphate synthase, small subunit | -3.21 | 0.52 |
| HD0047 |               | hypothetical protein not likely             | -3.31 | 0.43 |
| HD0048 |               | hypothetical protein                        | -3.34 | 0.36 |
| HD0591 |               | conserved hypothetical protein              | -3.37 | 0.16 |
| HD1310 | <i>flp3</i>   | <i>flp</i> operon protein Flp3              | -3.37 | 0.39 |
| HD1433 | <i>ompP2A</i> | outer membrane protein P2 homolog           | -3.49 | 0.43 |
| HD1920 |               | hypothetical protein                        | -3.51 | 0.25 |
| HD1311 | <i>flp2</i>   | <i>flp</i> operon protein Flp2              | -3.66 | 0.35 |
| HD0896 | <i>cysK</i>   | cysteine synthase                           | -3.92 | 0.23 |
| HD0769 | <i>dsrA</i>   | serum resistance protein DrsA               | -4.38 | 0.32 |
| HD0046 | <i>ompA2</i>  | major outer membrane protein homolog, OmpA2 | -5.72 | 0.21 |

<sup>a</sup> Median log<sub>2</sub> ratio of expression comparing 35000HPΔ*cpxR*(pML125) to 35000HPΔ*cpxR*(pLS88) from three independent experiments ( $p < 0.05$ ).
